## CORRESPONDENCE

Anesthesiology  
70:364, 1989

### Reflex Sympathetic Dystrophy Syndrome in Pregnancy

*To the Editor:*—The report by Simon *et al.*<sup>1</sup> prompts three comments. First, median or sciatic neuropathies, including Carpal Tunnel Syndromes (CTS), often produce severe burning pain, dysesthesiae, and vasomotor changes suggesting involvement of the autonomic fibers.<sup>2</sup> Sympathetic blocks transiently relieve those symptoms.<sup>2</sup> It seems more logical to speak of CTS with severe pain and vasomotor changes rather than of reflex sympathetic dystrophy secondary to a CTS. As the authors point out, CTS is not infrequent during pregnancy and is hardly worth reporting.

Second, the bilateral relief after a right stellate ganglion block (SGB) is puzzling. Although contralateral "mirror image" pain is an accepted concept,<sup>3</sup> contralateral relief following a block is not. It is questionable that a right stellate ganglion block could alleviate an electrically proven neuropathy in the left arm, unless one postulates seepage of the anesthetic solution from the right to the left cervical sympathetic chain. Did the authors see signs of left sympathetic blockade after each right stellate ganglion block?

Third, the permanent relief may have been due less to the sympathetic blocks than to the local steroid injection and splinting or to the natural course of the condition, since most CTS of pregnancy improve

toward the end of the gestation. In view of this last fact, one wonders why bilateral surgery was considered for this patient during her pregnancy.

RAY J. DEFALQUE, M.D.  
*Department of Anesthesia  
University of Alabama Medical School  
Veterans Administration Section  
Birmingham, Alabama 35233*

#### REFERENCES

1. Simon JN, Mokriski BK, Malinow AM, Martz DG Jr: Reflex sympathetic dystrophy syndrome in pregnancy. *ANESTHESIOLOGY* 69:100–102, 1988
2. Loh L, Nathan PW: Painful peripheral states and sympathetic blocks. *J Neurol Neurosurg Psychiatry* 41:664–671, 1978
3. Livingston WL: Pain mechanisms. New York, Plenum Press, 1976, pp 124–125

(Accepted for publication October 17, 1988.)

Anesthesiology  
70:364, 1989

*In Reply:*—Dr. Defalque correctly points out that stellate ganglion block may relieve pain in patients with no evidence of abnormal sympathetic function.<sup>1</sup> Our patient, however, exhibited the vasomotor and dystrophic changes that define reflex sympathetic dystrophy.<sup>2</sup> In our patient, as in many patients with upper extremity reflex sympathetic dystrophy,<sup>3</sup> the precipitating nerve trauma appears to have been related to median nerve insult. Although median nerve compression (carpal tunnel syndrome) during pregnancy is common,<sup>4</sup> its triggering of a reflex sympathetic dystrophy during pregnancy is not common.<sup>5</sup>

Our patient's symptoms were more severe in her right upper extremity than in her left. Although we did not see any evidence of left (bilateral) sympathetic blockade, right stellate ganglion blockade repeatedly decreased the symptoms of her bilateral reflex sympathetic dystrophy. We believe that the interruption of aberrant reflex activity in the internuncial neuron pool may represent the neurochemical "seepage" that Dr. Defalque suspects.

Surgical decompression was considered because of the severity of our patient's symptoms. The relief obtained from bilateral corticosteroid injections was incomplete and short lived. This temporary relief does support the diagnosis of carpal tunnel compression as the antecedent trauma precipitating her reflex sympathetic dystrophy.

JAMES N. SIMON, D.O.  
*Assistant Professor of Anesthesiology*

BETTYLOU K. MOKRISKI, M.D.  
*Assistant Professor of Anesthesiology*

ANDREW M. MALINOW, M.D.  
*Assistant Professor of Anesthesiology  
and Obstetrics and Gynecology*

*University of Maryland  
School of Medicine  
22 South Greene Street  
Baltimore, Maryland 21201*

#### REFERENCES

1. Loh L, Nathan PW: Painful peripheral states and sympathetic blocks. *J Neuro Neurosurg Psychiatry* 41:664–671, 1978
2. Bonica JJ: Causalgia and other reflex sympathetic dystrophies, *Advances in Pain Research and Therapy*, Vol. 3. Edited by Benedetti C, Chapman CR, Morrica G. New York, Raven Press, 1979, pp 141–166
3. Bonica JJ: *The Management of Pain*. Philadelphia, Lea and Febiger, 1953, pp 948
4. Voitek AJ, Mueller JC, Farlinger DE, Johnston RU: Carpal tunnel syndrome in pregnancy. *Can Med Assoc J* 128:277–287, 1983
5. Simon JN, Mokriski BLK, Malinow AM, Martz DG: Reflex sympathetic dystrophy syndrome in pregnancy. *ANESTHESIOLOGY* 69:100–102, 1988

(Accepted for publication October 17, 1988.)
